# Supplementary material for: Re-visiting the evolution, dispersal and epidemiology of Zika virus in Asia
Source: PubMed Central journal article supplement (PMC5940881; doi:10.1038/s41426-018-0082-5), 2018-05-09

### Supplementary figure S7 – TempEst and MM regression of Asian ZIKV

Regressions were made with TempEst v.1.5.1. (A) and with MM regression (B) using robust regression (blue line) and ordinary least squared regression (OLS, black dashed line).

**A**

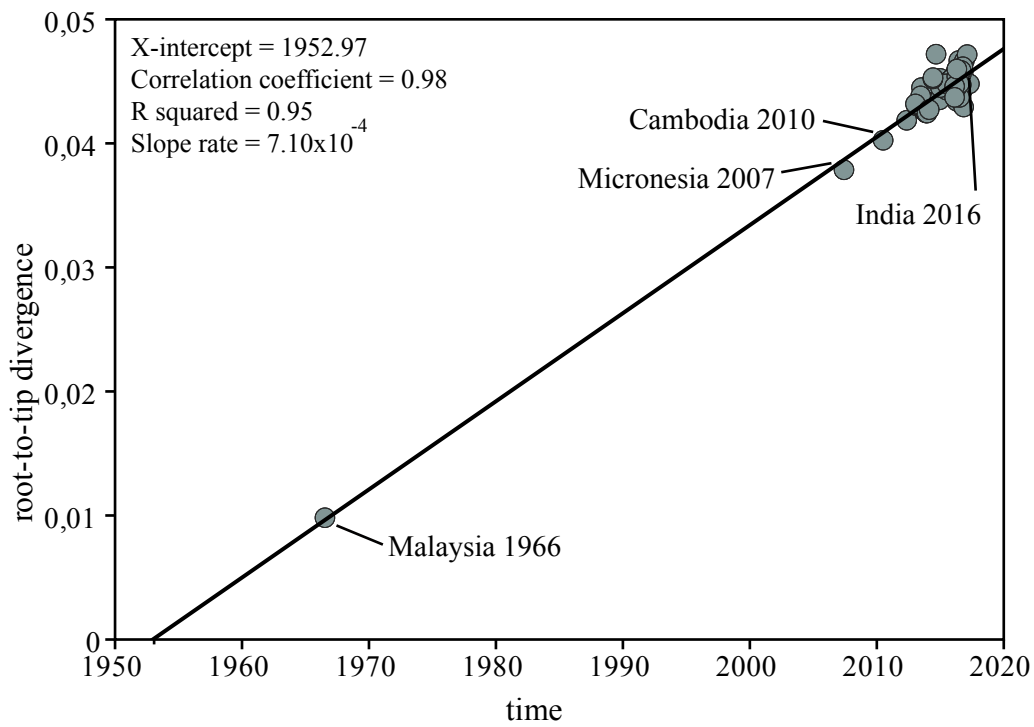

**B**

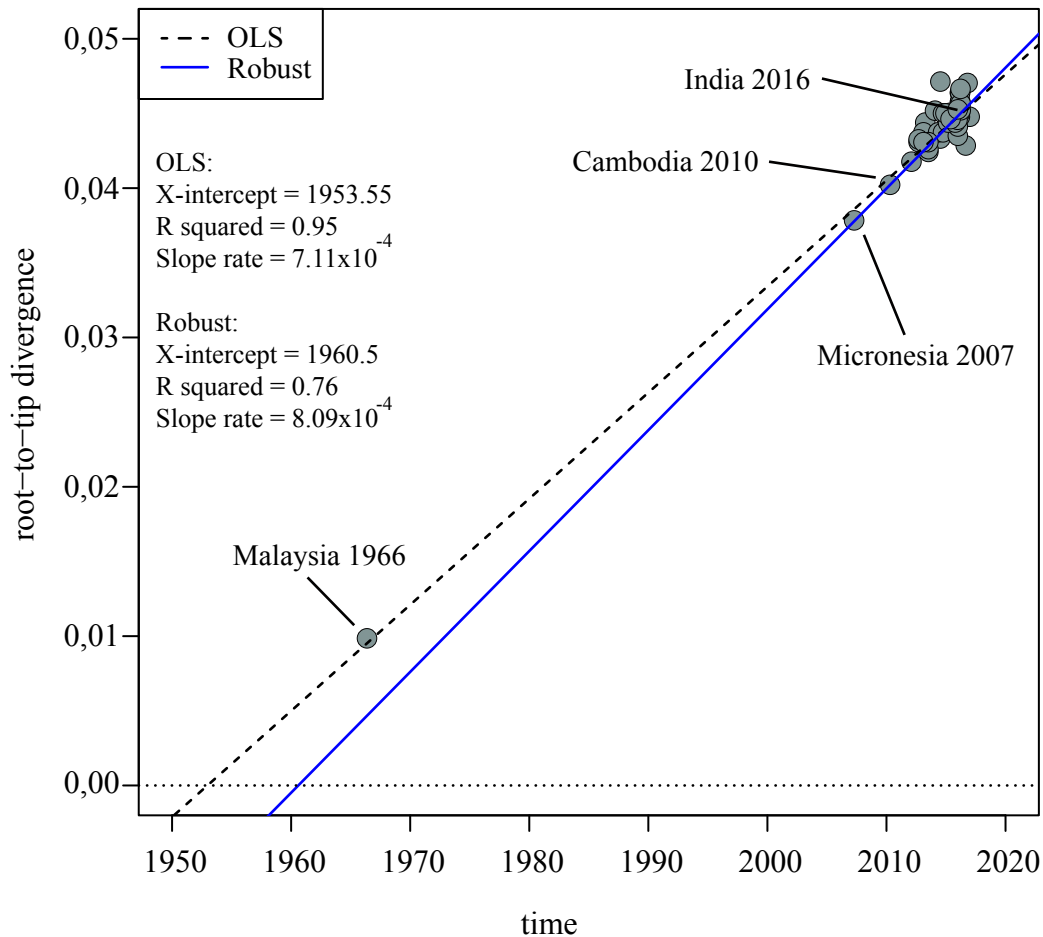

Supplement: 41426_2018_82_MOESM7_ESM.pdf [file 41426_2018_82_MOESM7_ESM.pdf]
