# Supplementary material for: Re-visiting the evolution, dispersal and epidemiology of Zika virus in Asia
Source: PubMed Central journal article supplement (PMC5940881; doi:10.1038/s41426-018-0082-5), 2018-05-09
Supplement: 41426_2018_82_MOESM8_ESM.pdf [file 41426_2018_82_MOESM8_ESM.pdf]

Supplementary table 1. Detailed summary of all diversification events summarized in Figure 1 as estimated from the BEAST analysis including 84 partial and complete Asian ZIKV genomes

| <b>Node</b> | <b>Diversification event</b>       | <b>tMRCA</b>               | <b>95% HPD</b> |         |
|-------------|------------------------------------|----------------------------|----------------|---------|
| <b>A</b>    | Malaysia 1966 / other ZIKV         | 1954–04                    | 1948–08        | 1959–05 |
| <b>B</b>    | India / other ZIKV                 | 1956–10                    | 1949–09        | 1964–05 |
| <b>C</b>    | Philippine–Micronesia / other ZIKV | 1997–01                    | 1994–09        | 1999–03 |
| <b>D</b>    | Cambodia / other ZIKV              | 2001–01                    | 1999–02        | 2003–12 |
| <b>E</b>    | Vietnam / other ZIKV               | 2004–06                    | 2002–06        | 2006–04 |
| <b>F</b>    | Thailand–Bangladesh / other ZIKV   | 2005–01                    | 2003–11        | 2009–05 |
| <b>G</b>    | Indonesia / other ZIKV             | 2006–03                    | 2004–09        | 2007–06 |
| <b>H</b>    | Thailand / other ZIKV              | 2006–09                    | 2005–05        | 2007–01 |
| <b>I</b>    | Thailand / other ZIKV              | 2007–10                    | 2006–06        | 2009–01 |
| <b>J</b>    | Thailand–Singapore / other ZIKV    | 2009–01                    | 2007–12        | 2010–02 |
| <b>K</b>    | Vietnam / other ZIKV               | 2010–02                    | 2009–01        | 2011–03 |
| <b>L</b>    | Vietnam / other ZIKV               | 2011–05                    | 2010–01        | 2012–07 |
| <b>M1</b>   | Pacific islands / Pi–American ZIKV | 2012–06                    | 2011–12        | 2013–01 |
| <b>M2</b>   | Pacific islands / Pi–American ZIKV | 2012–09                    | 2012–01        | 2013–02 |
| <b>M3</b>   | Pacific islands / Pi–American ZIKV | 2012–11                    | 2012–07        | 2013–03 |
| <b>M4</b>   | Pacific islands / American ZIKV    | 2013–01                    | 2012–09        | 2013–05 |
| <b>N</b>    | American ZIKV                      | 2013–03                    | 2012–11        | 2013–06 |
|             | <b>Mean evolutionary rate</b>      | 7.26x10 <sup>-4</sup>      |                |         |
|             | <b>95% HPD evolutionary rate</b>   | 6.28–8.19x10 <sup>-4</sup> |                |         |
