# Supplementary material for: Re-visiting the evolution, dispersal and epidemiology of Zika virus in Asia
Source: PubMed Central journal article supplement (PMC5940881; doi:10.1038/s41426-018-0082-5), 2018-05-09
Supplement: 41426_2018_82_MOESM9_ESM.pdf [file 41426_2018_82_MOESM9_ESM.pdf]

Supplementary table S2. Information on sequences used in the phylogenetic and dating analyses.

| <b>Name in trees</b>                   | <b>Genbank accession</b> | <b>Origin</b>      | <b>Collection date</b> | <b>Complete/Partial</b> | <b>If partial, which region</b> | <b>Coding nucleotide length</b> |
|----------------------------------------|--------------------------|--------------------|------------------------|-------------------------|---------------------------------|---------------------------------|
| Mexico_KY606273 2016-06-30             | KY606273                 | Mexico             | 2016-06-30             | Complete                | –                               | 10272                           |
| Martinique_KU647676 2015-12            | KU647676                 | Martinique         | 2015-12                | Complete                | –                               | 10272                           |
| French_Guiana_KU758877 2015-12         | KU758877                 | French Guiana      | 2015-12                | Complete                | –                               | 10272                           |
| Peru_KY693678 2016-06-28               | KY693678                 | Peru               | 2016-06-28             | Complete                | –                               | 10272                           |
| Peru_KY693679 2016-07-11               | KY693679                 | Peru               | 2016-07-11             | Complete                | –                               | 10272                           |
| Suriname_KU312312 2015-10-02           | KU312312                 | Suriname           | 2015-10-02             | Complete                | –                               | 10272                           |
| Jamaica_KY785419 2016-06-13            | KY785419                 | Jamaica            | 2016-06-13             | Near complete           | –                               | 10030                           |
| Mexico_KY631493 2015-10-15             | KY631493                 | Mexico             | 2015-10-15             | Complete                | –                               | 10270                           |
| Puerto_Rico_KX601168 2015-12-01        | KX601168                 | Puerto Rico        | 2015-12-01             | Complete                | –                               | 10272                           |
| Honduras_KY693676 2016-08-26           | KY693676                 | Honduras           | 2016-08-26             | Complete                | –                               | 10267                           |
| Nicaragua_MF434522 2016-08-29          | MF434522                 | Nicaragua          | 2016-08-29             | Complete                | –                               | 10272                           |
| Panama_KX156776 2015-12-18             | KX156776                 | Panama             | 2015-12-18             | Complete                | –                               | 10272                           |
| Panama_KX156774 2015-12-18             | KX156774                 | Panama             | 2015-12-18             | Complete                | –                               | 10272                           |
| Colombia_MF574572 2015-12              | MF574572                 | Colombia           | 2015-12                | Complete                | –                               | 10272                           |
| Colombia_KU820897 2015-12              | KU820897                 | Colombia           | 2015-12                | Complete                | –                               | 10272                           |
| Brazil_KY558999 2016-07-10             | KY558999                 | Brazil             | 2016-07-10             | Complete                | –                               | 10271                           |
| Ecuador_KX879604 2016-04               | KX879604                 | Ecuador            | 2016-04                | Complete                | –                               | 10272                           |
| Venezuela_China_KU820898 2016-02-14    | KU820898                 | Venezuela          | 2016-02-14             | Complete                | –                               | 10272                           |
| Guatemala_KU501217 2015-11-01          | KU501217                 | Guatemala          | 2015-11-01             | Complete                | –                               | 10272                           |
| Brazil_KX197192 2015                   | KX197192                 | Brazil             | 2015                   | Complete                | –                               | 10272                           |
| Brazil_KY272991 2016-02-12             | KY272991                 | Brazil             | 2016-02-12             | Complete                | –                               | 10272                           |
| Honduras_KX694534 2015-01-06           | KX694534                 | Honduras           | 2015-01-06             | Complete                | –                               | 10272                           |
| Brazil_KX520666 2015-08                | KX520666                 | Brazil             | 2015-08                | Complete                | –                               | 10272                           |
| Brazil_KU729217 2015                   | KU729217                 | Brazil             | 2015                   | Complete                | –                               | 10272                           |
| Dominican_Republic_KY014300 2016-04-20 | KY014300                 | Dominican Republic | 2016-04-20             | Complete                | –                               | 10272                           |
| USA_KY325476 2016-10-11                | KY325476                 | USA                | 2016-10-11             | Near complete           | –                               | 10234                           |
| USA_KY014323 2016-08-23                | KY014323                 | USA                | 2016-08-23             | Complete                | –                               | 10272                           |
| Cuba_MF159531 2017-04-19               | MF159531                 | Cuba               | 2017-04-19             | Complete                | –                               | 10270                           |
| Guadeloupe_KX673530 2016-04-21         | KX673530                 | Guadeloupe         | 2016-04-21             | Complete                | –                               | 10272                           |
| Guatemala_KU501216 2015-12-01          | KU501216                 | Guatemala          | 2015-12-01             | Complete                | –                               | 10272                           |
| Ecuador_KX879603 2016-04               | KX879603                 | Ecuador            | 2016-04                | Complete                | –                               | 10272                           |
| Cuba_MF438286 2017-02-12               | MF438286                 | Cuba               | 2017-02-12             | Complete                | –                               | 10271                           |
| Haiti_KY415988 2014-06-05              | KY415988                 | Haiti              | 2014-06-05             | Complete                | –                               | 10272                           |
| Haiti_KY415990 2014-06-02              | KY415990                 | Haiti              | 2014-06-02             | Complete                | –                               | 10272                           |
| Haiti_KU509998 2014-12-12              | KU509998                 | Haiti              | 2014-12-12             | Complete                | –                               | 10272                           |
| Haiti_USA_KX051563 2016-02-05          | KX051563                 | Haiti              | 2016-02-05             | Complete                | –                               | 10272                           |
| French_Polynesia_KX447518 2013-12      | KX447518                 | French Polynesia   | 2013-12                | Near complete           | –                               | 9062                            |

|                                            |          |                  |            |               |                       |       |
|--------------------------------------------|----------|------------------|------------|---------------|-----------------------|-------|
| French_Polynesia_KX447510 2013-12          | KX447510 | French Polynesia | 2013-12    | Complete      | –                     | 10272 |
| French_Polynesia_KX447509 2013-12          | KX447509 | French Polynesia | 2013-12    | Complete      | –                     | 10272 |
| French_Polynesia_KX447513 2013-12          | KX447513 | French Polynesia | 2013-12    | Complete      | –                     | 10272 |
| French_Polynesia_KJ776791 2013-11-28       | KJ776791 | French Polynesia | 2013-11-28 | Complete      | –                     | 10272 |
| French_Polynesia_KX447512 2013-12          | KX447512 | French Polynesia | 2013-12    | Complete      | –                     | 10272 |
| French_Polynesia_KX447521 2014-02          | KX447521 | French Polynesia | 2014-02    | Near complete | –                     | 8286  |
| Tonga_exAustralia_KX806557 2016-02         | KX806557 | Tonga            | 2016-02    | Complete      | –                     | 10272 |
| Fiji_exJapan_LC191864 2016-04-21           | LC191864 | Fiji             | 2016-04-21 | Complete      | –                     | 10272 |
| American_Samoa_exChina_KU866423 2016       | KU866423 | American Samoa   | 2016       | Complete      | –                     | 10272 |
| American_Samoa_exChina_KX185891 2016-02-17 | KX185891 | American Samoa   | 2016-02-17 | Complete      | –                     | 10272 |
| French_Polynesia_KX447519 2013-11          | KX447519 | French Polynesia | 2013-11    | Near complete | –                     | 8993  |
| French_Polynesia_KX447520 2014-01          | KX447520 | French Polynesia | 2014-01    | Near complete | –                     | 8864  |
| French_Polynesia_KX447511 2014-01          | KX447511 | French Polynesia | 2014-01    | Complete      | –                     | 10272 |
| French_Polynesia_KX369547 2013-10-25       | KX369547 | French Polynesia | 2013-10-25 | Complete      | –                     | 10272 |
| French_Polynesia_KX447515 2013-11          | KX447515 | French Polynesia | 2013-11    | Complete      | –                     | 10272 |
| French_Polynesia_KX447514 2014-01          | KX447514 | French Polynesia | 2014-01    | Complete      | –                     | 10272 |
| French_Polynesia_KX447516 2014-01          | KX447516 | French Polynesia | 2014-01    | Complete      | –                     | 10272 |
| French_Polynesia_KX447517 2014-01          | KX447517 | French Polynesia | 2014-01    | Complete      | –                     | 10272 |
| Viet_Nam KY131441 2013-01                  | KY131441 | VietNam          | 2013-01    | Partial       | Envelope              | 1490  |
| Viet_Nam KY131442 2013-06                  | KY131442 | VietNam          | 2013-06    | Partial       | Envelope              | 1512  |
| VietNam_exJapan_LC219720 2016-11-22        | LC219720 | VietNam          | 2016-11-22 | Complete      | –                     | 10272 |
| Thailand_exTaiwan_KY126349 2016-10         | KY126349 | Thailand         | 2016-10    | Partial       | Capsid, PrM, Envelope | 2382  |
| Thailand_MF692778.1 2016-10                | MF692778 | Thailand         | 2016-10    | Complete      | –                     | 10272 |
| Singapore_KX827309 2016-08-28              | KX827309 | Singapore        | 2016-08-28 | Complete      | –                     | 10272 |
| Singapore_KX813683 2016-08-27              | KX813683 | Singapore        | 2016-08-27 | Complete      | –                     | 10272 |
| Singapore_KY241691 2016-09-13              | KY241691 | Singapore        | 2016-09-13 | Complete      | –                     | 10271 |
| Thailand_exTaiwan_KY126351 2016-05         | KY126351 | Thailand         | 2016-05    | Complete      | –                     | 10272 |
| Thailand_KU681081 2014-07-19               | KU681081 | Thailand         | 2014-07-19 | Complete      | –                     | 10272 |
| Thailand_KX051560 2013-07-09               | KX051560 | Thailand         | 2013-07-09 | Complete      | –                     | 10272 |
| Indonesia_exTaiwan_KY126345 2016-06        | KY126345 | Indonesia        | 2016-06    | Partial       | Capsid, PrM, Envelope | 2382  |
| Indonesia_KU179098 2014-12-30              | KU179098 | Indonesia        | 2014-12-30 | Complete      | –                     | 10272 |
| Malaysia_exTaiwan_KY126348 2016-10         | KY126348 | Malaysia         | 2016-10    | Partial       | Capsid, PrM, Envelope | 2382  |
| Thailand_KX051562 2015-01-16               | KX051562 | Thailand         | 2015-01-16 | Complete      | –                     | 10270 |
| Bangladesh_exChina_KY328290 2016-11-03     | KY328290 | Bangladesh       | 2016-11-03 | Complete      | –                     | 10272 |
| Thailand_KX051561 2013-09-21               | KX051561 | Thailand         | 2013-09-21 | Complete      | –                     | 10271 |
| Bangladesh KY064008 2014-09-01             | KY064008 | Bangladesh       | 2014-09-01 | Partial       | PrM, envelope         | 630   |
| Thailand_KX694532 2013-02-12               | KX694532 | Thailand         | 2013-02-12 | Complete      | –                     | 10272 |
| Thailand_Canada_KF993678 2013-02-19        | KF993678 | Thailand         | 2013-02-19 | Near complete | –                     | 10141 |
| Thailand_KY272987 2016-08-30               | KY272987 | Thailand         | 2016-08-30 | Complete      | –                     | 10272 |

|                                             |                              |                          |            |          |                               |                |
|---------------------------------------------|------------------------------|--------------------------|------------|----------|-------------------------------|----------------|
| VietNam_exTaiwan_KY126347 2016-09           | KY126347                     | VietNam                  | 2016-09    | Partial  | Capsid, PrM, Envelope         | 2382           |
| Cambodia_JN860885 2010                      | JN860885                     | Cambodia                 | 2010       | Complete | –                             | 10267          |
| Philippines_KY003152 2016-09-01             | KY003152                     | Philippines              | 2016-09-01 | Partial  | Envelope                      | 1862           |
| Philippines_KU681082 2012-05-09             | KU681082                     | Philippines              | 2012-05-09 | Complete | –                             | 10272          |
| Philippines_South_Korea_KY553111 2016-04    | KY553111                     | Philippines              | 2016-04    | Complete | –                             | 10260          |
| Micronesia_EU545988 2007-06-01              | EU545988                     | Micronesia               | 2007-06-01 | Complete | –                             | 10269          |
| India_MF173409.MF173410.MF173411 2016-11-14 | MF173409; MF173410; MF173411 | India                    | 2016-11-14 | Partial  | capsid, envelope and NS2b/NS3 | 453, 773, 1393 |
| Malaysia_KX601167 1966-07-14                | KX601167                     | Malaysia                 | 1966-07-14 | Complete | –                             | 10272          |
| Uganda_MR766_NC_012532.1_1947               | NC_012532.1                  | Uganda                   | 1947       | Complete | –                             | 10259          |
| Uganda_MR766_AY632535.2_1947                | AY632535.2                   | Uganda                   | 1947       | Complete | –                             | 10259          |
| Uganda_MR766_KU963573.1_1947-04-20          | KU963573.1                   | Uganda                   | 1947-04-20 | Complete | –                             | 10260          |
| Central_African_Republic_KF268949.1_1980-08 | KF268949.1                   | Central African Republic | 1980-08    | Complete | –                             | 10254          |
| Central_African_Republic_KF268948.1_1979-11 | KF268948.1                   | Central African Republic | 1979-11    | Complete | –                             | 10269          |
